# Supplementary material for: Incorporating male sterility increases hybrid maize yield in low input African farming systems
Source: PubMed Central journal article supplement (PMC9307751; doi:10.1038/s42003-022-03680-7), 2022-07-22
Supplement: 42003_2022_3680_MOESM2_ESM.pdf [file 42003_2022_3680_MOESM2_ESM.pdf]

## Supplementary Figures and Tables

Supplementary Figure 1. Map designating on-farm and on-station yield trial locations.

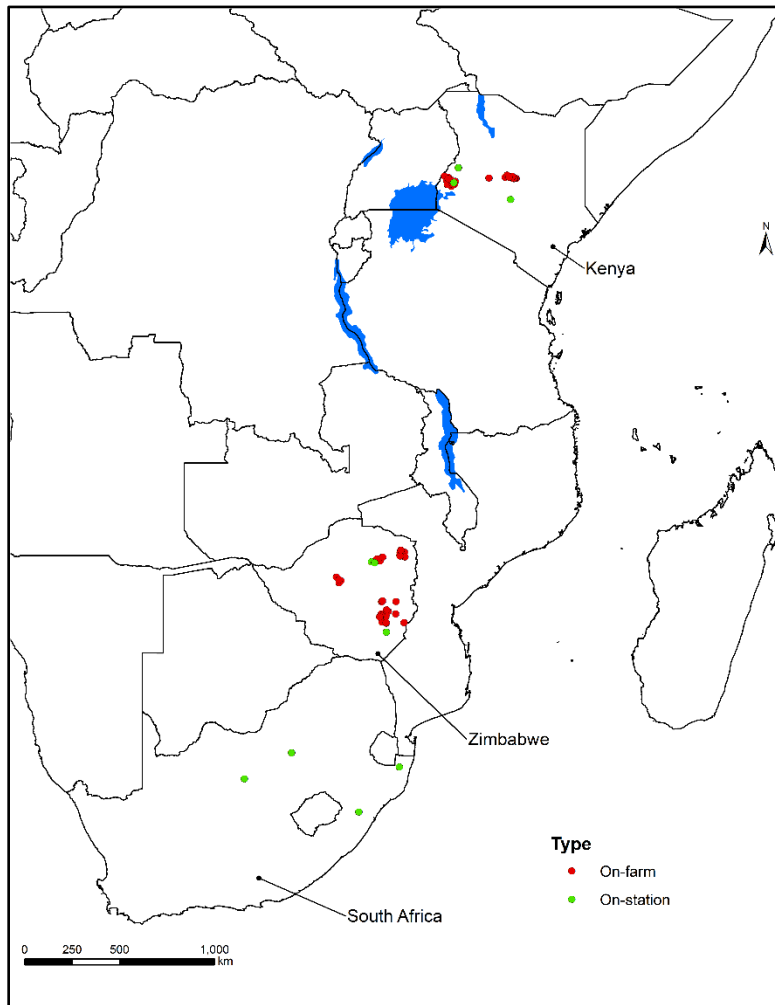

Supplementary Table 1. Number of replicates, hybrid backgrounds and locations in yield trials conducted on-farm (OFT) and on-station (OST) for each country and year.

| Country      | Year    | Type      | Locations | Pedigrees | Reps |
|--------------|---------|-----------|-----------|-----------|------|
| Kenya        | 2017    | Onfarm    | 24        | 4         | 2    |
|              |         | Onstation | 6         | 4         | 4    |
|              | 2018    | Onfarm    | 20        | 8         | 2    |
|              |         | Onstation | 6         | 11        | 4    |
| South Africa | 2017-18 | Onstation | 8         | 15        | 4    |
| Zimbabwe     | 2017-18 | Onfarm    | 17        | 6         | 2    |
|              |         | Onstation | 7         | 12        | 12   |
|              | 2018-19 | Onfarm    | 18        | 6         | 2    |
|              |         | Onstation | 6         | 15        | 12   |

Supplementary Table 2. Overview of participants in farmer evaluations.

| Year    | Region  | Mid-season             |     |       | End-season             |     |       | Overall                |      |       |
|---------|---------|------------------------|-----|-------|------------------------|-----|-------|------------------------|------|-------|
|         |         | Number of participants |     |       | Number of participants |     |       | Number of participants |      |       |
|         |         | Women                  | Men | Total | Women                  | Men | Total | Women                  | Men  | Total |
| 2017    | Central | 86                     | 46  | 132   | 131                    | 45  | 176   | 217                    | 91   | 308   |
|         | Western | 64                     | 73  | 137   | 300                    | 261 | 561   | 364                    | 334  | 698   |
|         | Total   | 150                    | 119 | 269   | 431                    | 306 | 737   | 581                    | 425  | 1006  |
|         | %       | 56                     | 44  | 100   | 58                     | 42  | 100   | 58                     | 42   | 100   |
| 2018    | Central | 275                    | 127 | 402   | 295                    | 113 | 408   | 570                    | 240  | 810   |
|         | Western | 227                    | 193 | 420   | 289                    | 172 | 461   | 516                    | 365  | 881   |
|         | Total   | 502                    | 320 | 822   | 584                    | 285 | 869   | 1086                   | 605  | 1691  |
|         | %       | 61                     | 39  | 100   | 67                     | 33  | 100   | 64                     | 36   | 100   |
| Overall | Total   | 652                    | 439 | 1091  | 1015                   | 591 | 1606  | 1667                   | 1030 | 2697  |
|         | %       | 60                     | 40  |       | 63                     | 37  |       | 62                     | 38   |       |

Supplementary Table 3. Study design for the participatory evaluations.

| Criteria No. | Treatment group                | Year          | Criteria                                  | How important is this criterion? <sup>a</sup> | For each plot, please evaluate the variety for this criterion on a scale of A to E <sup>b</sup> |        |     |
|--------------|--------------------------------|---------------|-------------------------------------------|-----------------------------------------------|-------------------------------------------------------------------------------------------------|--------|-----|
|              |                                |               |                                           |                                               | Plot 1                                                                                          | Plot 2 | ... |
| 1            | All                            | 2017 and 2018 | Germination/Crop stand                    |                                               |                                                                                                 |        |     |
| 2            | All                            | 2017 and 2018 | Height                                    |                                               |                                                                                                 |        |     |
| 3            | All                            | 2017 and 2018 | Stalk thickness                           |                                               |                                                                                                 |        |     |
| 4            | All                            | 2017 and 2018 | Number of cobs per plant                  |                                               |                                                                                                 |        |     |
| 5            | All                            | 2017 and 2018 | Cob size                                  |                                               |                                                                                                 |        |     |
| 6            | All                            | 2017 and 2018 | Barrenness level                          |                                               |                                                                                                 |        |     |
| 7            | All                            | 2017 and 2018 | Yield                                     |                                               |                                                                                                 |        |     |
| 8            | All                            | 2017 and 2018 | Biomass (for fodder)                      |                                               |                                                                                                 |        |     |
| 9            | All                            | 2017 and 2018 | Resistance to stalk borer                 |                                               |                                                                                                 |        |     |
| 10           | All                            | 2017 and 2018 | Drought resistance                        |                                               |                                                                                                 |        |     |
| 11           | All                            | 2017 and 2018 | Foliar disease resistant                  |                                               |                                                                                                 |        |     |
| 12           | All                            | 2017 and 2018 | Tillers development                       |                                               |                                                                                                 |        |     |
| 13           | All                            | 2017 and 2018 | Early maturing                            |                                               |                                                                                                 |        |     |
| 14           | All                            | 2018 only     | Husk cover                                |                                               |                                                                                                 |        |     |
| 15           | All                            | 2018 only     | Drooping of the ear                       |                                               |                                                                                                 |        |     |
| 16           | All                            | 2018 only     | Cob rot resistance                        |                                               |                                                                                                 |        |     |
| 17           | All                            | 2018 only     | Lodging resistance                        |                                               |                                                                                                 |        |     |
| 14           | Treatment 1 and 2 <sup>c</sup> | 2017 and 2018 | Good tassel formation                     |                                               |                                                                                                 |        |     |
| 15           | Treatment 2 only               | 2017 and 2018 | Amount of pollen shed (good pollination)  |                                               |                                                                                                 |        |     |
| 20           | All                            | 2017 and 2018 | Overall evaluation (note: not an average) |                                               |                                                                                                 |        |     |

<sup>a</sup> Codes: 0 = not important, 1 = somewhat important, 2 = important, 3 = very important

<sup>b</sup> Codes: A = like very much, B = like, C = neither like nor dislike, D = dislike, E = dislike very much.

<sup>c</sup> In 2108, four criteria were added.

<sup>c</sup> Note: In the mid-season of 2017, farmers were randomly assigned to three groups: control, treatment 1 and treatment 2; all participants evaluated the varieties on criteria 1 to 13 and 16, both treatment groups also on criterion 14, only those in treatment 2 on criterion 15. In 2018, treatment groups 1 and 2 were merged.

Supplementary Table 4. Expected benefits of fifty-percent non-pollen producing (FNP) in terms of yield, production and economic gain (25 top producing maize countries, including all with 128,000 ha or above). Benefits estimated using a 10% adoption rate of FNP hybrids.

| Country                      | Area harvested (1000 ha) | Yield (kg ha <sup>-1</sup> ) | Hybrid adoption rate (%) | Yield gain (kg ha <sup>-1</sup> ) | Area in FNP (ha) | Production gain (tonnes) | Economic gain (US\$ 1000) | FNP seed needed (tonnes) |
|------------------------------|--------------------------|------------------------------|--------------------------|-----------------------------------|------------------|--------------------------|---------------------------|--------------------------|
| Nigeria                      | 4,853                    | 10,155                       | 11.6                     | 192.8                             | 56,299           | 10,852                   | 1,784                     | 1,407                    |
| United Republic of Tanzania  | 4,101                    | 5,987                        | 40.2                     | 189                               | 164,843          | 31,149                   | 5,121                     | 4,121                    |
| Democratic Republic of Congo | 2,680                    | 2,078                        | 9.6                      | 184.9                             | 25,611           | 4,734                    | 778                       | 640                      |
| Angola                       | 2,655                    | 2,271                        | 4.1                      | 185.3                             | 10,884           | 2,017                    | 332                       | 272                      |
| South Africa                 | 2,319                    | 12,510                       | 87.5                     | 212.6                             | 202,899          | 43,130                   | 7,091                     | 5,072                    |
| Ethiopia                     | 2,236                    | 7,360                        | 66                       | 200                               | 147,568          | 29,506                   | 4,851                     | 3,689                    |
| Kenya                        | 2,142                    | 4,014                        | 65                       | 191.4                             | 139,213          | 26,652                   | 4,382                     | 3,480                    |
| Mozambique                   | 1,827                    | 1,654                        | 24.9                     | 185.6                             | 45,484           | 8,442                    | 1,388                     | 1,137                    |
| Malawi                       | 1,685                    | 2,698                        | 65.7                     | 189.8                             | 110,727          | 21,017                   | 3,455                     | 2,768                    |
| Cameroon                     | 1,316                    | 2,345                        | 52.2                     | 190.9                             | 68,737           | 13,121                   | 2,157                     | 1,718                    |
| Zimbabwe                     | 1,191                    | 730                          | 95.4                     | 183.9                             | 113,662          | 20,900                   | 3,436                     | 2,842                    |
| Ghana                        | 1,184                    | 2,306                        | 3.1                      | 191.9                             | 3,672            | 705                      | 116                       | 92                       |
| Benin                        | 1,158                    | 1,510                        | 0                        | 188                               |                  |                          |                           |                          |
| Uganda                       | 1,131                    | 2,964                        | 37.6                     | 195.9                             | 42,524           | 8,332                    | 1,370                     | 1,063                    |
| Mali                         | 1,129                    | 3,625                        | 0                        | 199.5                             |                  |                          |                           |                          |
| Zambia                       | 1,086                    | 2,395                        | 61.5                     | 193.4                             | 66,789           | 12,919                   | 2,124                     | 1,670                    |
| Burkina Faso                 | 1,019                    | 1,700                        | 3.8                      | 190.2                             | 38,76            | 737                      | 121                       | 97                       |
| Togo                         | 715                      | 887                          | 0.5                      | 187.6                             | 368              | 69                       | 11                        | 9                        |
| Guinea                       | 611                      | 819                          | 6.9                      | 188.2                             | 4,211            | 793                      | 130                       | 105                      |
| Cote d'Ivoire                | 473                      | 1,006                        | 34.4                     | 193                               | 16,275           | 3,140                    | 516                       | 407                      |
| Chad                         | 342                      | 438                          | 44.6                     | 187.9                             | 15,244           | 2,864                    | 471                       | 381                      |
| Rwanda                       | 296                      | 410                          | 22.4                     | 188.5                             | 6,625            | 1,249                    | 205                       | 166                      |
| Senegal                      | 180                      | 264                          | 10                       | 189                               | 1,791            | 338                      | 56                        | 45                       |
| Madagascar                   | 129                      | 215                          | 0                        | 190.2                             |                  |                          |                           |                          |
| Lesotho                      | 128                      | 100                          | 65.1                     | 184.9                             | 8,313            | 1,537                    | 253                       | 208                      |
|                              |                          |                              |                          |                                   | 1,255,61         |                          |                           |                          |
| Total top 25                 |                          | 70,441                       | 34.3                     | 191.8                             | 4                | 244,204                  | 40,147                    | 31,390                   |
| Total sub-Saharan Africa     |                          | 71,430                       |                          |                                   |                  |                          |                           |                          |

Supplementary Table 5. Economic analysis of FNP hybrids to determine net present value and rate of return; (25 top producing maize countries, including all with 128,000 ha or above). Benefits estimated using a 10% adoption rate of FNP hybrids, compared with estimated investment costs over time.

| Year                          | Year | Cost (1000 USD) | Benefit (1000 USD) | Present value 2020 (1000 USD) | Costs discounted (2020 1000 USD) | Benefits discounted (2020 1000 USD) |
|-------------------------------|------|-----------------|--------------------|-------------------------------|----------------------------------|-------------------------------------|
| 2010                          | -11  | 1000            |                    | -2853                         | 2853.1                           |                                     |
| 2011                          | -10  | 1000            |                    | -2594                         | 2593.7                           |                                     |
| 2012                          | -9   | 1000            |                    | -2358                         | 2357.9                           |                                     |
| 2013                          | -8   | 1000            |                    | -2144                         | 2143.6                           |                                     |
| 2014                          | -7   | 1000            |                    | -1949                         | 1948.7                           |                                     |
| 2015                          | -6   | 1000            |                    | -1772                         | 1771.6                           |                                     |
| 2016                          | -5   | 1000            |                    | -1611                         | 1610.5                           |                                     |
| 2017                          | -4   | 1600            |                    | -2343                         | 2342.6                           |                                     |
| 2018                          | -3   | 1600            |                    | -2130                         | 2129.6                           |                                     |
| 2019                          | -2   | 1600            |                    | -1936                         | 1936                             |                                     |
| 2020                          | -1   | 1600            |                    | -1750                         | 1760                             |                                     |
| 2021                          | 0    | 1250            |                    | -1250                         | 1250                             |                                     |
| 2022                          | 1    | 1250            | 4015               | 2513.4                        | 1136.4                           | 3650                                |
| 2023                          | 2    | 1250            | 8029               | 5602.8                        | 1033.1                           | 6636                                |
| 2024                          | 3    | 1250            | 12044              | 8109.8                        | 989.1                            | 9049                                |
| 2025                          | 4    | 800             | 16059              | 10422                         | 546.4                            | 10968                               |
| 2026                          | 5    | 500             | 20074              | 12153.7                       | 310.5                            | 12464                               |
| 2027                          | 6    | 300             | 24088              | 13427.9                       | 169.3                            | 13597                               |
| 2028                          | 7    | 100             | 28103              | 14370                         | 51.3                             | 14421                               |
| 2029                          | 8    |                 | 32118              | 14983.2                       |                                  | 14983                               |
| 2030                          | 9    |                 | 36132              | 15323.7                       |                                  | 15324                               |
| 2031                          | 10   |                 | 40147              | 15487.5                       |                                  | 15478                               |
| 2032                          | 11   |                 | 40147              | 14071.3                       |                                  | 14071                               |
| 2033                          | 12   |                 | 40147              | 12792.1                       |                                  | 12792                               |
| 2034                          | 13   |                 | 40147              | 11629.2                       |                                  | 11629                               |
| 2035                          | 14   |                 | 40147              | 10572                         |                                  | 10572                               |
| 2036                          | 15   |                 | 40147              | 9610.9                        |                                  | 9611                                |
| 2037                          | 16   |                 | 40147              | 8737.2                        |                                  | 8737                                |
| 2038                          | 17   |                 | 40147              | 7942.9                        |                                  | 7943                                |
| 2039                          | 18   |                 | 40147              | 7220.8                        |                                  | 7221                                |
| 2040                          | 19   |                 | 40147              | 6564.4                        |                                  | 6564                                |
| Net present value (NPR)       |      |                 |                    | 176.829                       | 28883                            | 205712                              |
| Internal rate of return (IRR) |      |                 |                    | 0.26                          |                                  |                                     |
| Benefits                      |      |                 |                    | 205712                        |                                  |                                     |
| Costs                         |      |                 |                    | 2883                          |                                  |                                     |
| BC                            |      |                 |                    | 7.12                          |                                  |                                     |
